# Supplementary material for: A self-healing and antibacterial electronic skin based on a natural small molecule
Source: Royal Society of Chemistry journal article supplement (doi:10.1039/d2tc05354c), 2023-01-01
Supplement: d2tc05354c1.pdf [file d2tc05354c1.pdf]

1  
2  
3  
4  
5  
6  
7  
8  
9  
10  
11  
12  
13  
14  
15  
16  
17  
18  
19  
20  
21  
22

## Support information

### A self-healing and antibacterial electronic skin based on a natural small molecular

Yuqi Wang,<sup>‡a</sup> Shuangsheng Zhang,<sup>‡a</sup> Yuemin Zhou,<sup>a</sup> Fuhao Dong,<sup>\*b</sup> He Liu,<sup>b</sup> and Xu  
Xu,<sup>\*a</sup>

a. College of Chemical Engineering, Nanjing Forestry University, Co-Innovation  
Center of Efficient Processing and Utilization of Forest Resources, Jiangsu Provincial  
Key Lab for the Chemistry and Utilization of Agro-forest Biomass, Nanjing 210037,  
Jiangsu Province, China.

b. Institute of Chemical Industry of Forestry Products, Chinese Academy of Forestry,  
Key Laboratory of Biomass Energy and Material, National Engineering Laboratory for  
Biomass Chemical Utilization, Key and Open Laboratory of Forest Chemical  
Engineering, State Forestry Administration, Nanjing 210042, Jiangsu Province, China.

\*Corresponding authors: Email: [horsedong1993@hotmail.com](mailto:horsedong1993@hotmail.com) (F. D.),  
[xuxu200121@hotmail.com](mailto:xuxu200121@hotmail.com) (X. X.).

<sup>†</sup>Yuqi Wang and Shuangsheng Zhang have contributed equally to this work.

23 **Cross-linking density test:** The cross-linking density of the sample was determined by  
24 the equilibrium swelling method. First, the sample was immersed in toluene at room  
25 temperature until the swelling was balanced. Then, take out the sample and suck up the  
26 excess liquid with filter paper. Finally, the sample is weighed and the cross-linking  
27 density is calculated by the following formulas.

$$28 \quad \varphi = \left(\frac{m_1}{\rho_1}\right) / \left[\frac{m_2 - m_1}{\rho_2} + \frac{m_1}{\rho_1}\right]$$

$$29 \quad \gamma_e = \frac{\rho_1}{M_c} = - [\ln(1 - \varphi) + \varphi + x_1 \varphi^2] / (v_0 \varphi^{1/3})$$

30 Where  $\varphi$ ,  $m_1$ , and  $\rho_1$  are the volume fraction, the weight, and the density of the original  
31 sample, respectively.  $m_2$  is the weight of the swollen sample,  $\rho_2$  is the density of  
32 toluene (0.87 g/cm<sup>3</sup>).  $\gamma_e$ ,  $M_c$ ,  $x_1$ , and  $v_0$  are the cross-linking density, the average  
33 molecular weight of the cross-linked molecules, the interaction parameter of polymer  
34 and solvent (0.465), and the molar volume of toluene (106.54 cm<sup>3</sup>/mol).

35

36

37

38

39

40

41

42

43

44

## 45 Results and Discussion

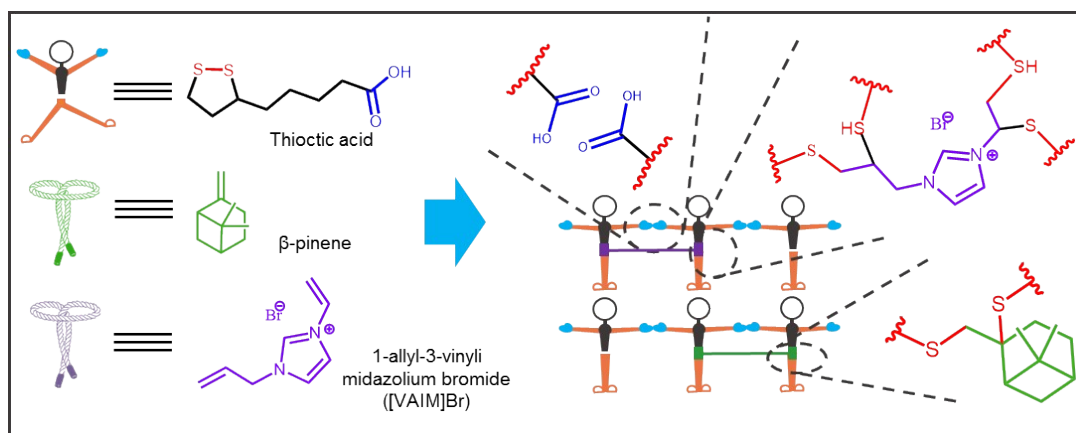

46

47 Fig. S1. The illustration of the preparation of the TA-β-[VAIM]Br.

48

49

50

51

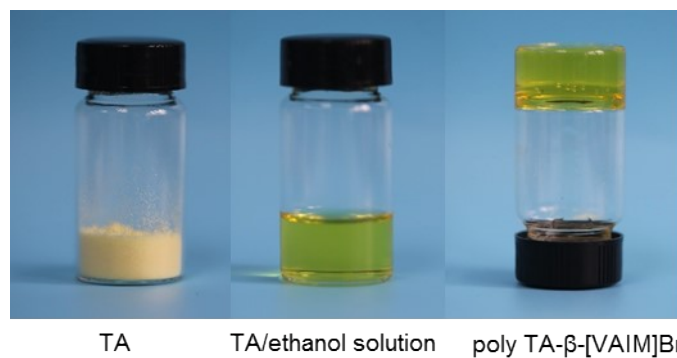

52

53 Fig. S2. Photos of the TA, TA/ethanol solution and the TA-β-[VAIM]Br.

54

55

56

57

58

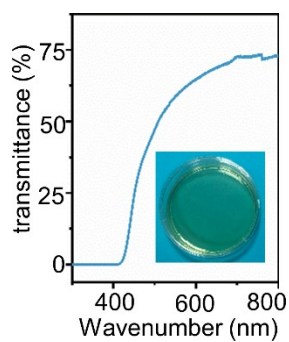

59

60 Fig. S3. UV-vis transmission spectra of the TA- $\beta$ -[VAIM]Br. Inset: photographs of  
61 the TA- $\beta$ -[VAIM]Br

62

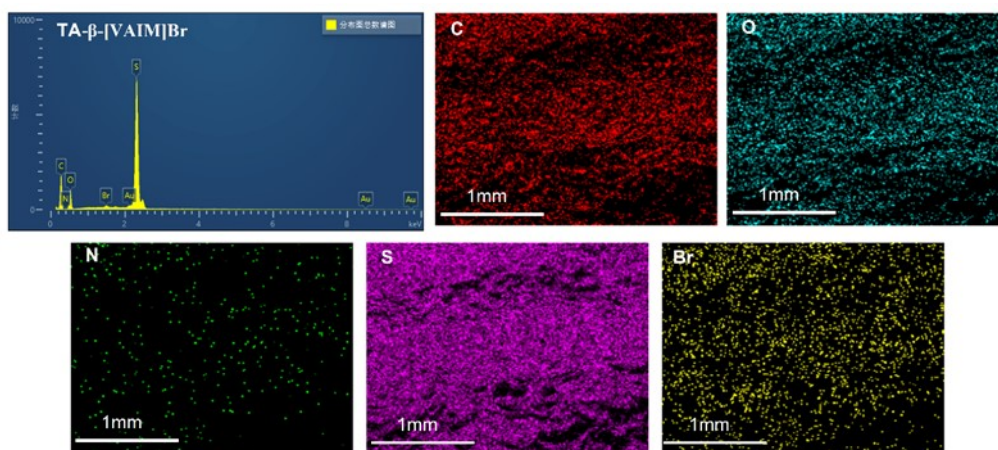

63

64 Fig. S4. The EDS spectroscopy of the TA- $\beta$ -[VAIM]Br.

65

66

67

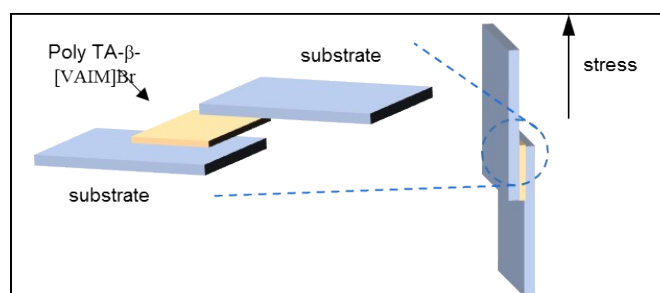

68

69 Fig. S5. Illustration of determining the shear strength of the TA- $\beta$ -[VAIM]Br towards

70

different substrates.

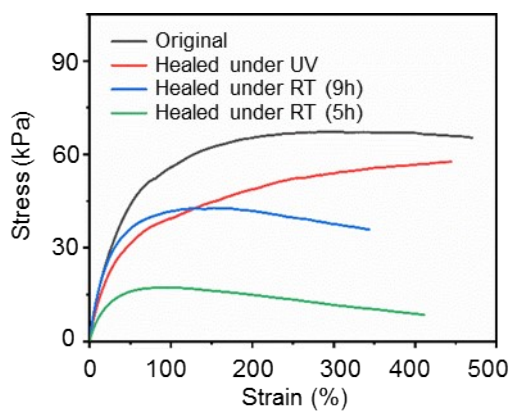

71

72 Fig. S6. The stress-strain curves of the healed and the original TA-β-[VAIM]Br.

73

74

75

76

77

78

79

80

81

82

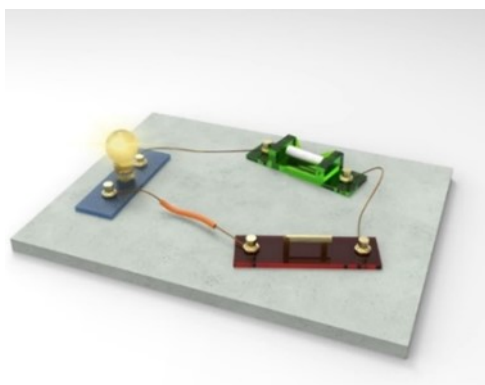

83

84

Fig. S7. Illustration of the circuit

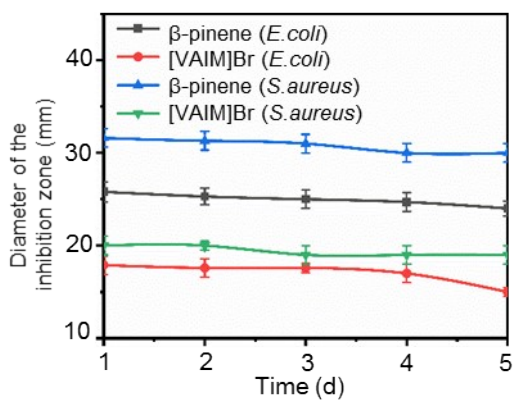

85

86 Fig. S8. The diameters of the inhibition zones of the *E. coli* and *S. aureus* treat by the

87

$\beta$ -pinene and [VAIM]Br with the function of time

88

89

90

91

92

93

94

95

96

97

98

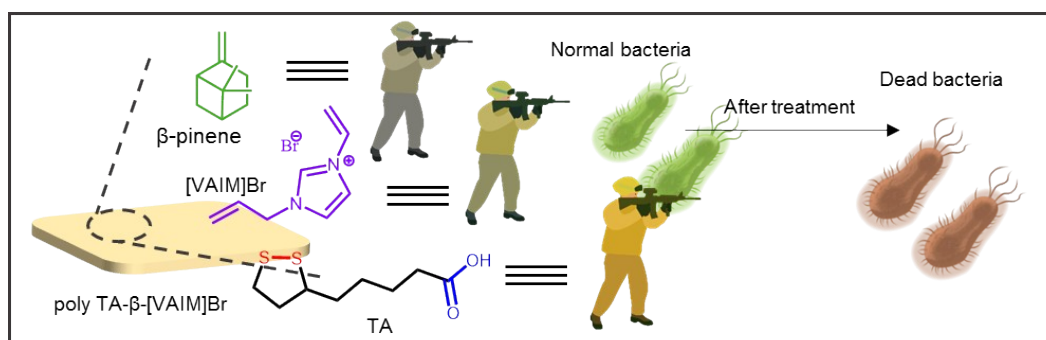

99

Fig. S9. Illustration of the antibacterial capacity of the TA- $\beta$ -[VAIM]Br

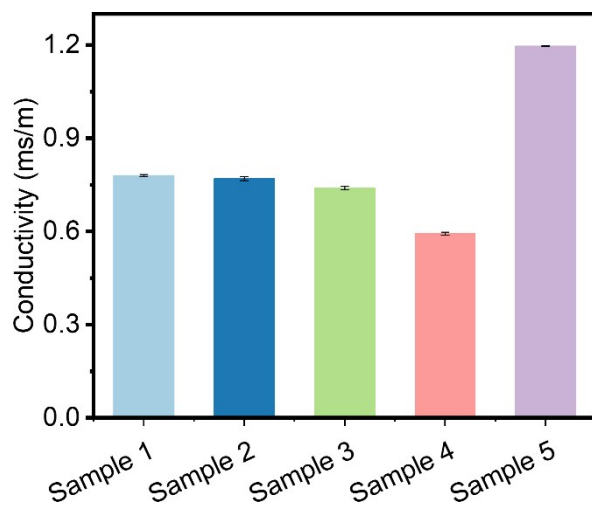

100

101

Fig. S10. The conductivity of the different TA- $\beta$ -[VAIM]Br

102

103

104

105

106

107

108

109

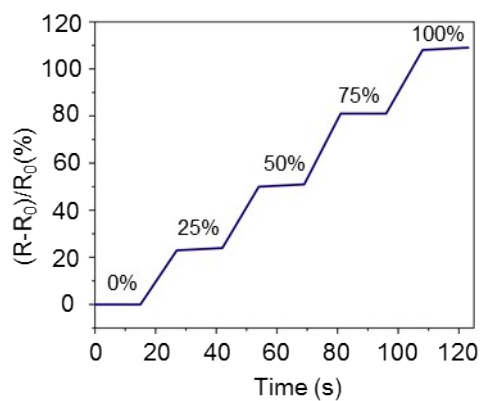

110

111 Fig. S11. The resistance changes of the TA- $\beta$ -[VAIM]Br with the function of time

112

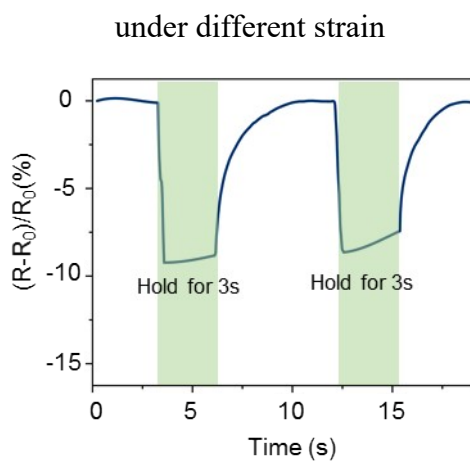

113

114 Fig. S12. The resistance changes of the TA- $\beta$ -[VAIM]Br under pressure

115

116

117

118

119

120

121

122

123

124

125

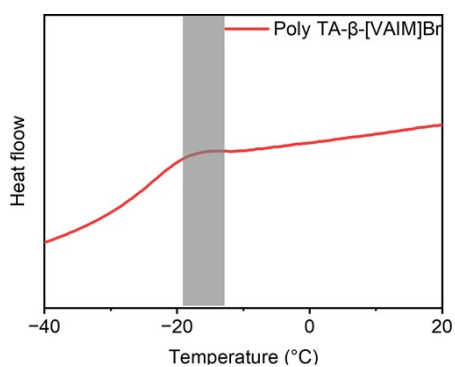

126



127

Fig. S13. DSC curves of the poly TA- $\beta$ -[VAIM]Br.

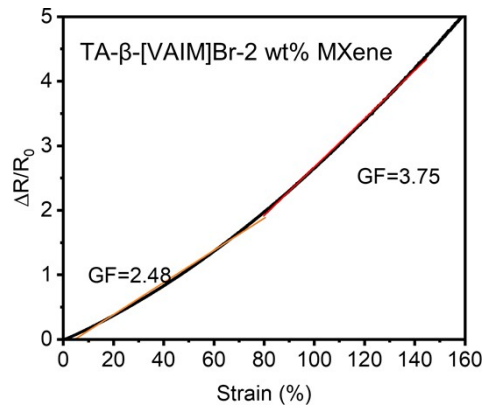

128

129

Fig. S14. The gauge factor of the poly TA- $\beta$ -[VAIM]Br-2 wt% Mxene.

130

131

132

133

134

135

136

137

138

139

140

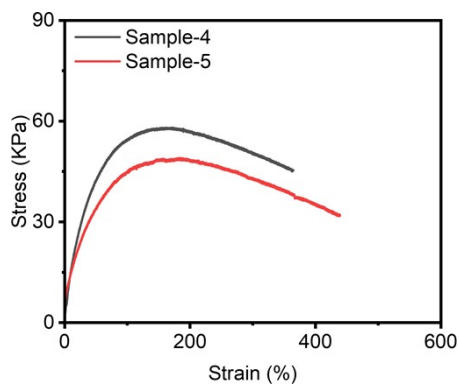

141

142

Fig. S15. The mechanical properties of samples 4 and 5.

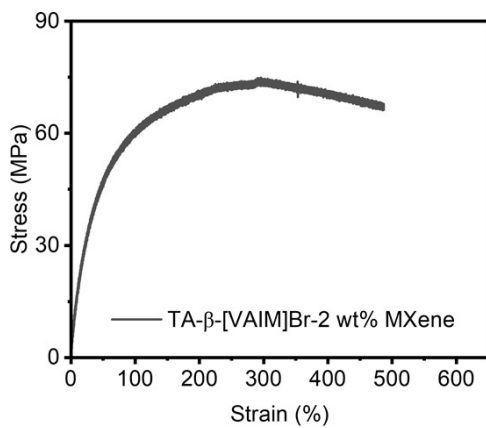

143

144

Fig. S16 The mechanical properties of the poly TA-β-[VAIM]Br-2 wt% Mxene.

145

146

147

148

149

150

151

152

153

154

155

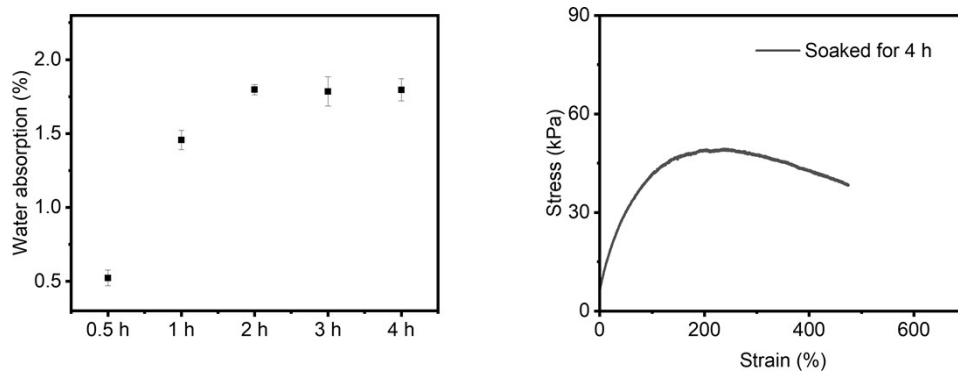

156

157

Fig. S17. Effect of water on the TA-β-[VAIM]Br.

158

159

Table S1 The detailed composition of the TA-β-[VAIM]Brs

| Sample   | TA (g) | Ethanol<br>(mL) | [VAIM]Br (g) | β-pinene (g) |
|----------|--------|-----------------|--------------|--------------|
| Sample-1 | 2.00   | 2.00            | 0.15         | 0.10         |
| Sample-2 | 2.00   | 2.00            | 0.15         | 0.15         |
| Sample-3 | 2.00   | 2.00            | 0.15         | 0.20         |
| Sample-4 | 2.00   | 2.00            | 0.10         | 0.15         |
| Sample-5 | 2.00   | 2.00            | 0.20         | 0.15         |

160

161

Table S2 Luria-Bertani (LB) medium

| Sample   | Weight (g/L) |
|----------|--------------|
| Tryptone | 10           |
| Yeast    | 5            |
| NaCl     | 5            |

162

163

Table S3 LB-agar medium

| Sample   | Weight (g/L) |
|----------|--------------|
| Tryptone | 10           |
| Yeast    | 5            |
| NaCl     | 5            |
| NaCl     | 2            |

164

165

166 Table S3 Comparison of the key characteristics of this work and the reported

167 electronic skin

|           | Stress (MPa) | Shear strength to the skin<br>(MPa) |
|-----------|--------------|-------------------------------------|
| This work | 0.067        | 0.06                                |
| Wu        | 0.06         | 0.029                               |
| Han       | 0.092        | 0.0178                              |
| Wu        | 0.0924       | 0.018                               |
| Cai       | 0.7          | 0.0177                              |
| Cai       | 0.15         | 0.024                               |
| Dong      | 4            | 0.009                               |
| Jin       | 0.15         | 0.03                                |
| Ma        | 0.04         | 0.02                                |
| Yang      | 0.027        | 0.012                               |

168  
169  
170  
171  
172  
173  
174  
175  
176  
177  
178  
179

180 Table S4 The detailed composition of the different poly TA- $\beta$ -[VAIM]Br.

| Sample   | Cross-linking density/g/cm <sup>3</sup> |
|----------|-----------------------------------------|
| Sample-1 | 0.259                                   |
| Sample-2 | 0.612                                   |
| Sample-3 | 0.467                                   |
| Sample-4 | 0.399                                   |
| Sample-5 | 0.401                                   |

181
